# Supplementary material for: Cocrystals of a 1,2,4-thiadiazole-based potent neuroprotector with gallic acid: solubility, thermodynamic stability relationships and formation pathways
Source: Royal Society of Chemistry journal article supplement (doi:10.1039/c8cp02532k), 2018-01-01
Supplement: c8cp02532k1.pdf [file c8cp02532k1.pdf]

## Supporting Information

### **Cocrystals of 1,2,4-thiadiazole-based potent neuroprotector with gallic acid: solubility, thermodynamic stability relationships and formation pathways**

Artem O. Surov<sup>a</sup>, Andrei V. Churakov<sup>b</sup>, Alexey N. Proshin<sup>c</sup>, Xia-Lin Dai<sup>d</sup>, Tongbu Lu<sup>e</sup>, German

L. Perlovich<sup>a,\*</sup>

<sup>a</sup>Institution of the Russian Academy of Sciences, G.A. Krestov Institute of Solution Chemistry RAS, 153045 Ivanovo, Russia.

<sup>b</sup>Institute of General and Inorganic Chemistry RAS, Leninsky Prosp. 31, 119991, Moscow, Russia.

<sup>c</sup>Institute of Physiologically Active Compounds of the Russian Academy of Sciences, 142432, Chernogolovka, Russia

<sup>d</sup>School of Pharmaceutical Sciences, Sun Yat-Sen University, 510006, Guangzhou, China

<sup>e</sup>Institute for New Energy Materials and Low Carbon Technologies, Tianjin University of Technology, 300384, Tianjin, China

\* To whom correspondence should be addressed:

Telephone: +7-4932-533784; Fax: +7-4932- 336237; E-mail: glp@isc-ras.ru

## Experimental details

### 1. Single-crystal X-ray diffraction structure determination of [TDZ:GA:H<sub>2</sub>O] (1:1:1)

Single-crystal X-ray diffraction data for the [TDZ:GA:H<sub>2</sub>O] (1:1:1) cocrystal were collected on a Bruker SMART APEX II diffractometer using graphite-monochromated Mo-*K* $\alpha$  radiation ( $\lambda = 0.71073$  Å) at 150K. Absorption correction based on measurements of equivalent reflections was applied.<sup>1</sup> The structure was solved by direct methods and refined by full matrix least-squares on  $F^2$  with anisotropic thermal parameters for all the non-hydrogen atoms.<sup>2</sup> All carbon H atoms were placed in calculated positions and refined using a riding model. All amino and hydroxy H atoms were found from difference Fourier synthesis and refined with restrained O-H distances. Terminal –CHMe(OH) group was found to be disordered over two positions with occupancy ratio 0.807(2)/0.193(2). Hydrogen atom H6 in gallic acid molecule was also equally disordered.

### 2. Solid-state DFT calculations

The DFT calculations of the [TDZ:GA:H<sub>2</sub>O] (1:1:1) cocrystal were performed with the CRYSTAL14<sup>3</sup> software suite using B3LYP functional with the Grimme<sup>4</sup> dispersion correction (D2) and 6-31G(d,p) basis set. The default CRYSTAL14 computation options are used to achieve an appropriate level of accuracy in evaluating the Coulomb and Hartree-Fock exchange series and the exchange-correlation contribution. Tolerance on energy controlling the self-consistent field convergence for geometry optimizations and frequencies computations is set to  $1 \times 10^{-9}$  and  $1 \times 10^{-10}$  hartree, respectively. The shrinking factor, reflecting the density of the k-points grid in the reciprocal space, was set at least to 3. In this work, the space group, unit cell parameters and positions of the heavy atoms were fixed and the structural relaxations were limited to the coordinates of the hydrogen atoms. The [TDZ:GA:H<sub>2</sub>O] (1:1:1) crystal structures that consisted of only one disordered component of the TDZ molecule (0.807 or 0.193 site occupancy) were used as the starting point in the solid-state DFT computations.

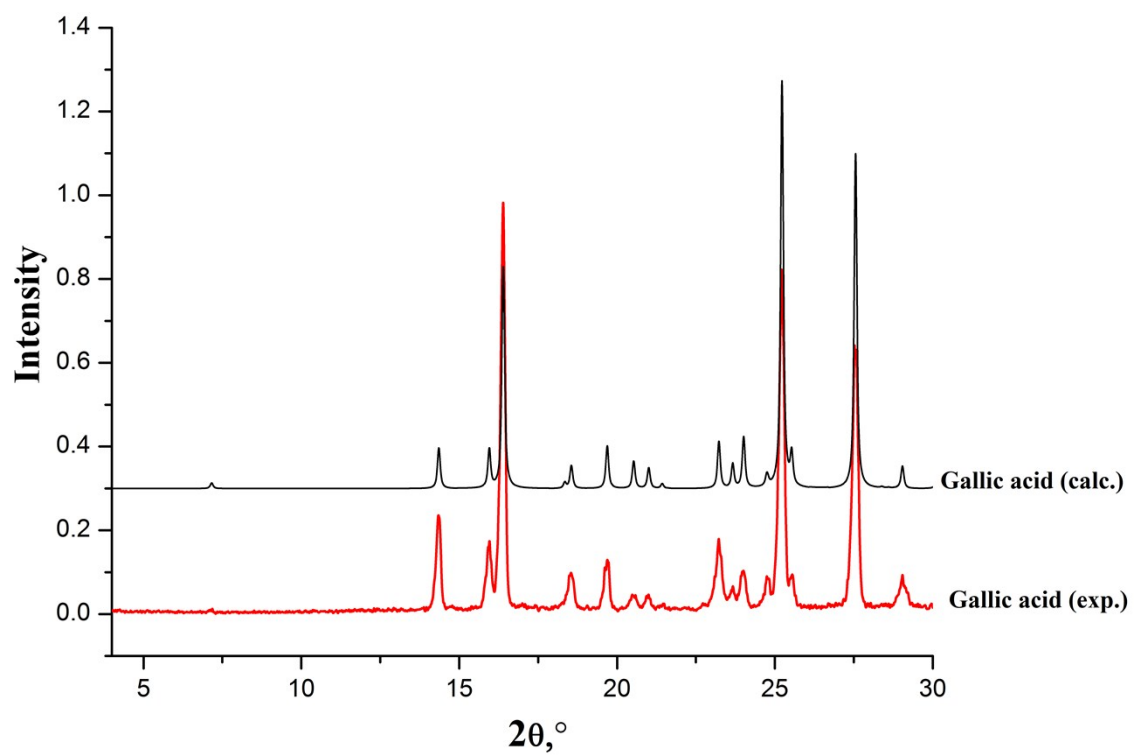

**Figure S1.** Experimental and calculated (IJUMEG05) PXRd patterns of gallic acid form II.

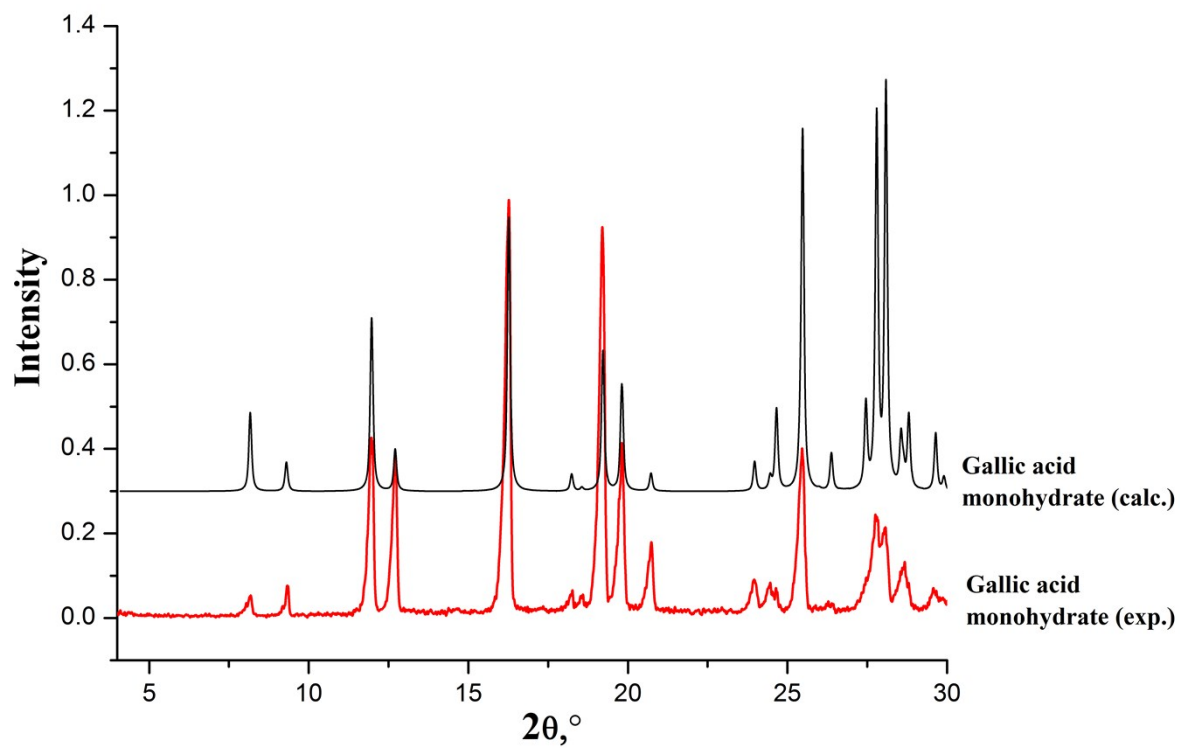

**Figure S2.** Experimental and calculated (IJUMEG05) PXRD patterns of gallic acid monohydrate form I.

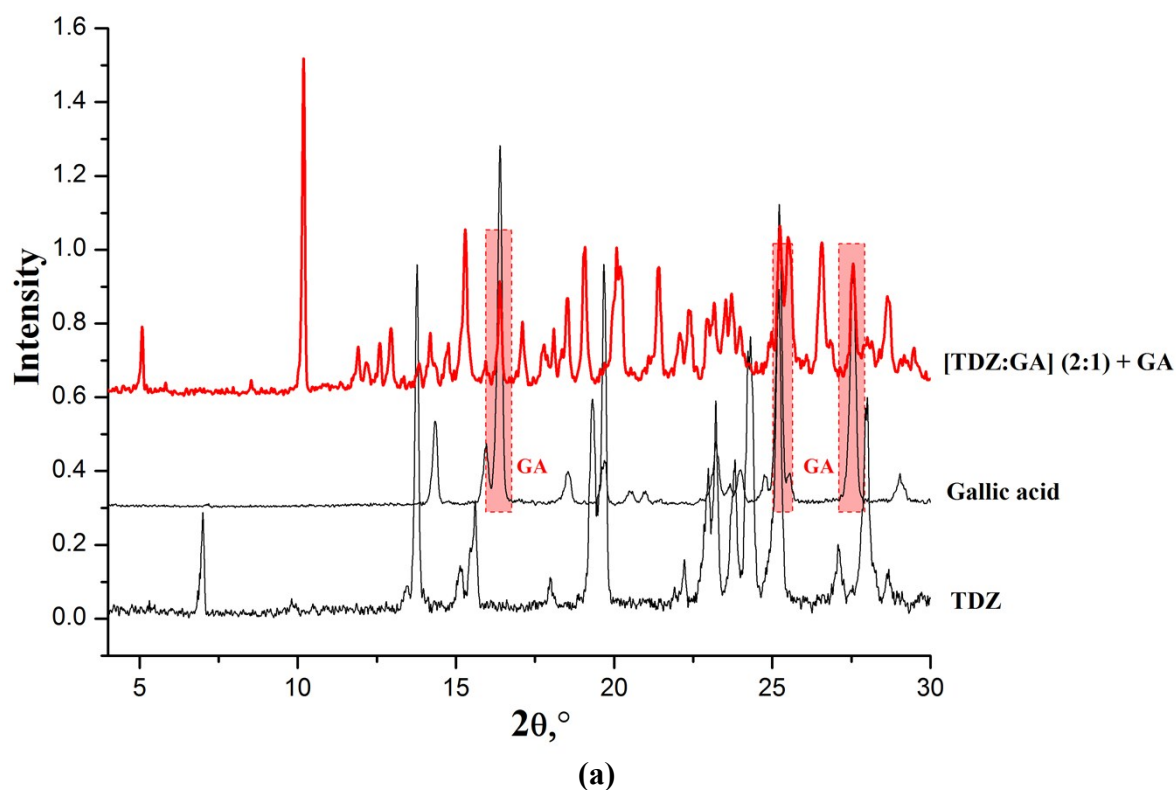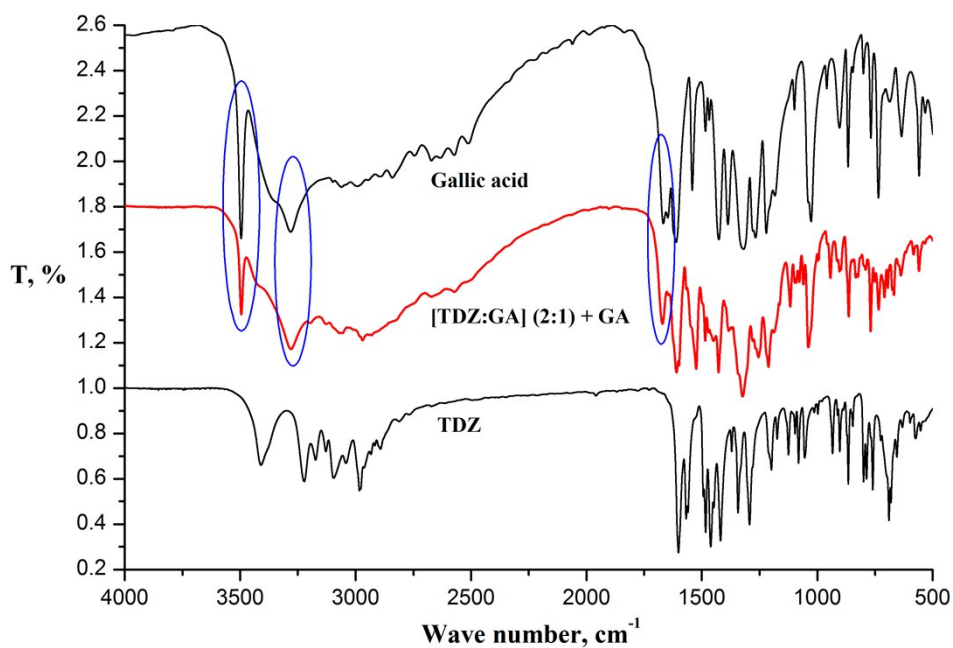

**Figure S3.** Experimental (a) XRPD patterns and (b) FT-IR spectra of TDZ, gallic acid and material obtained by liquid-assisted grinding of TDZ and GA in 1:1 molar ratio with acetonitrile.

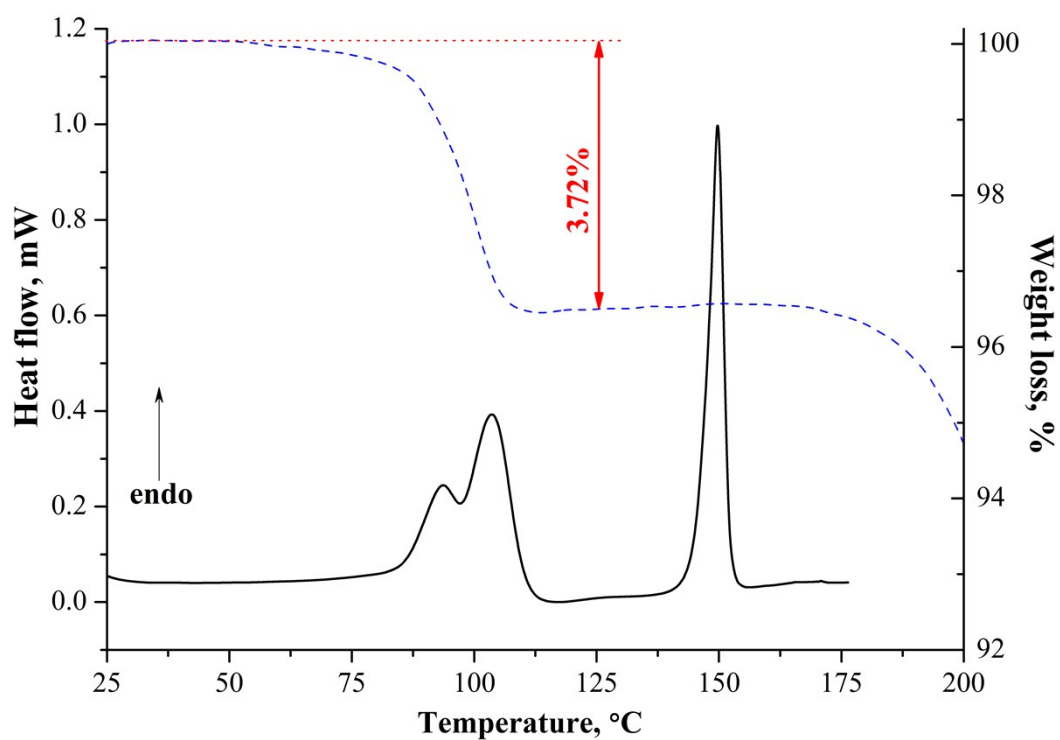

**Figure S4.** DSC thermogram and TG analysis of the [TDZ:GA:H<sub>2</sub>O] (1:1:1) cocrystal

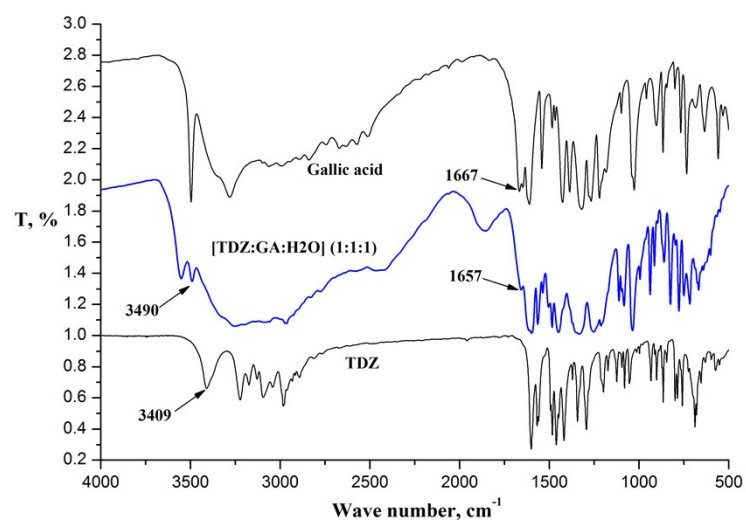

(a)

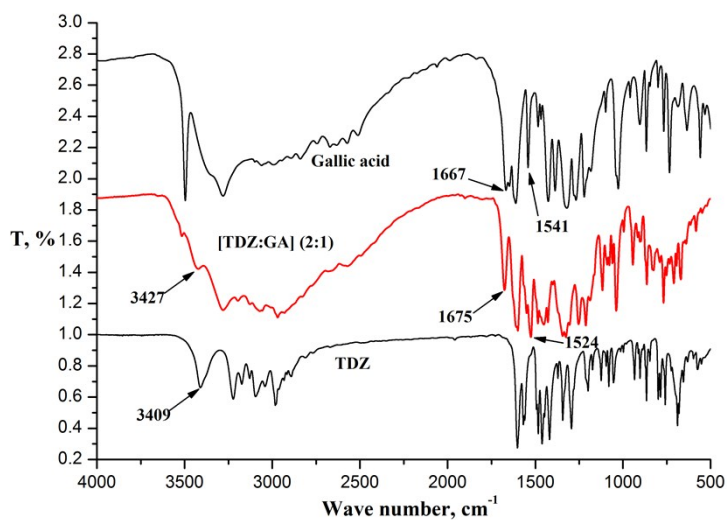

(b)

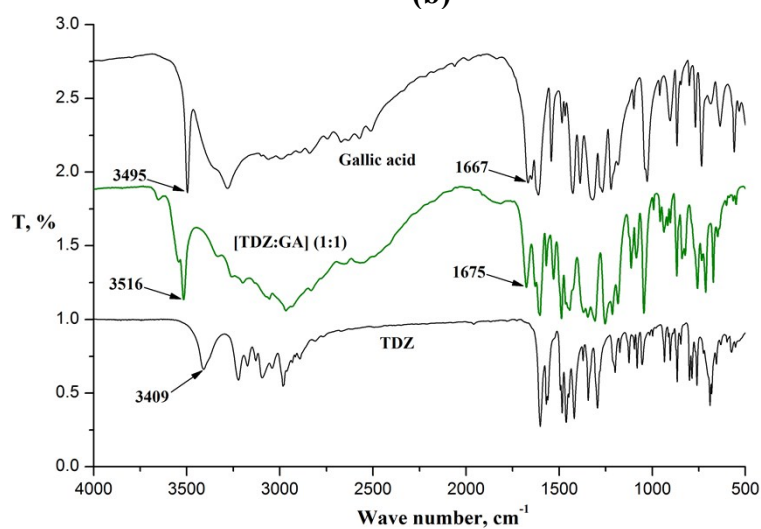

(c)

**Figure S5.** Experimental FT-IR spectra of TDZ, gallic acid and (a) [TDZ:GA:H<sub>2</sub>O] (1:1:1), (b) [TDZ:GA] (2:1), (c) [TDZ:GA] (1:1) cocrystals.

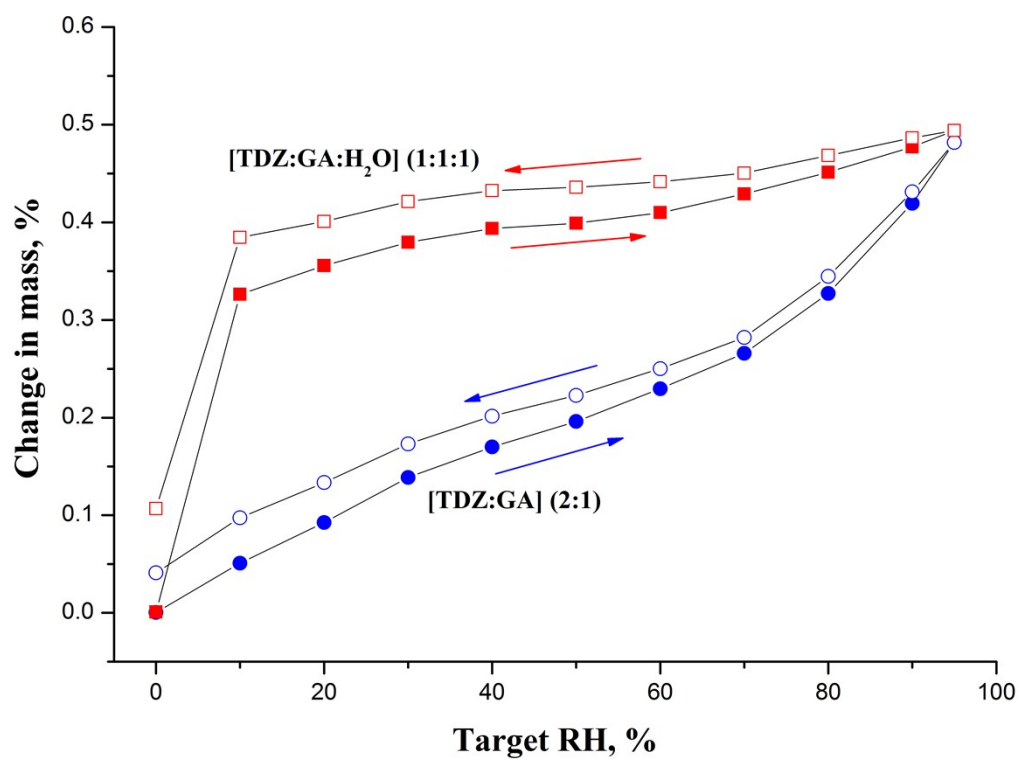

**Figure S6.** Water sorption (full points) and desorption (empty) curves of [TDZ:GA] (2:1) (blue) and [TDZ:GA:H<sub>2</sub>O] (1:1:1) (red) at 25°C.



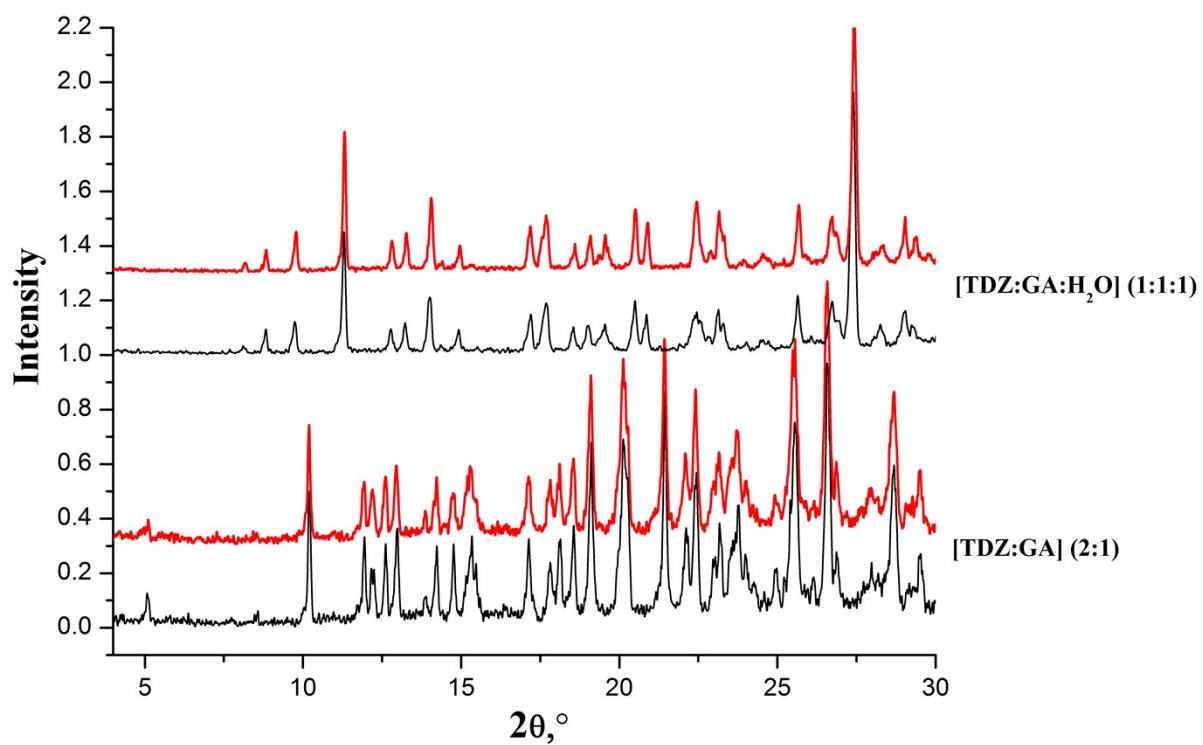

**Figure S7.** Experimental XRPD patterns of [TDZ:GA:H<sub>2</sub>O] (1:1:1) and [TDZ:GA] (2:1) before (black) and after (red) DVS studies

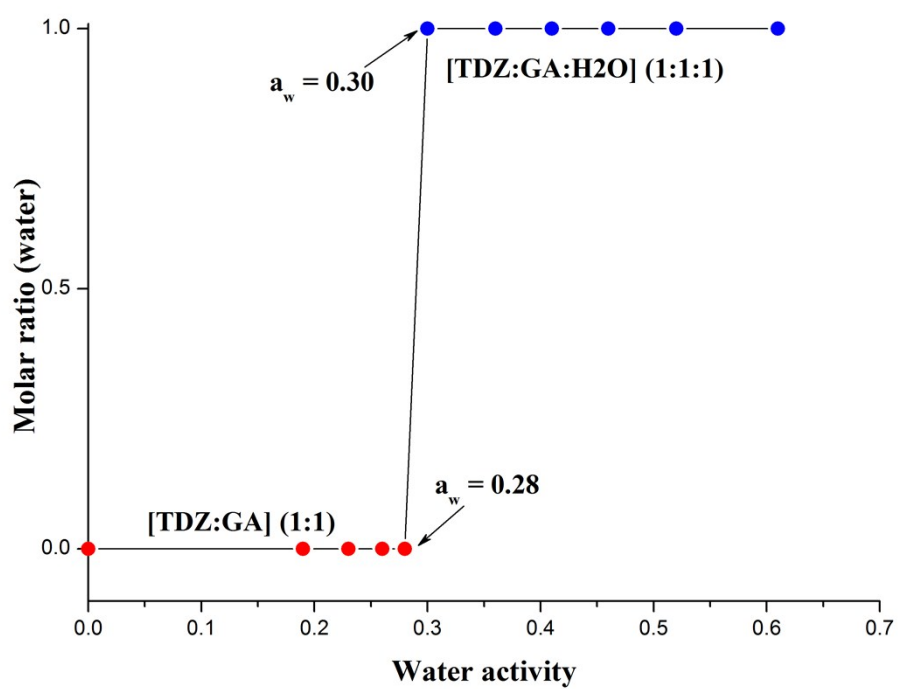

**Figure S8.** Phase diagram showing the dependence of the [TDZ:GA] (1:1) cocrystal stability on water activity in acetonitrile/water mixtures at 25.0 °C.

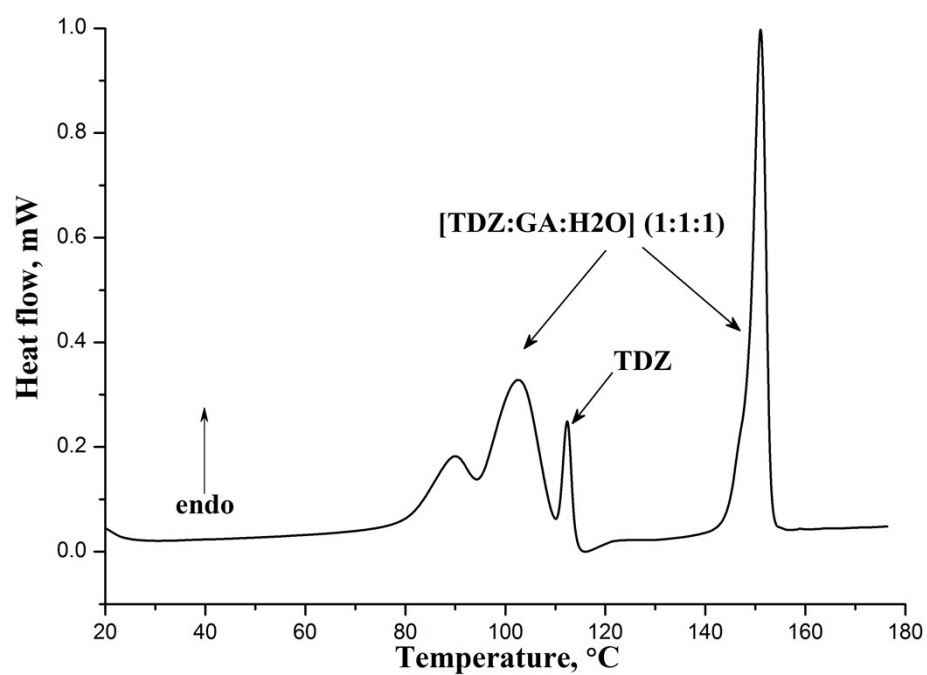

**Figure S9.** Example of DSC analysis of the solid phase at the eutectic point.

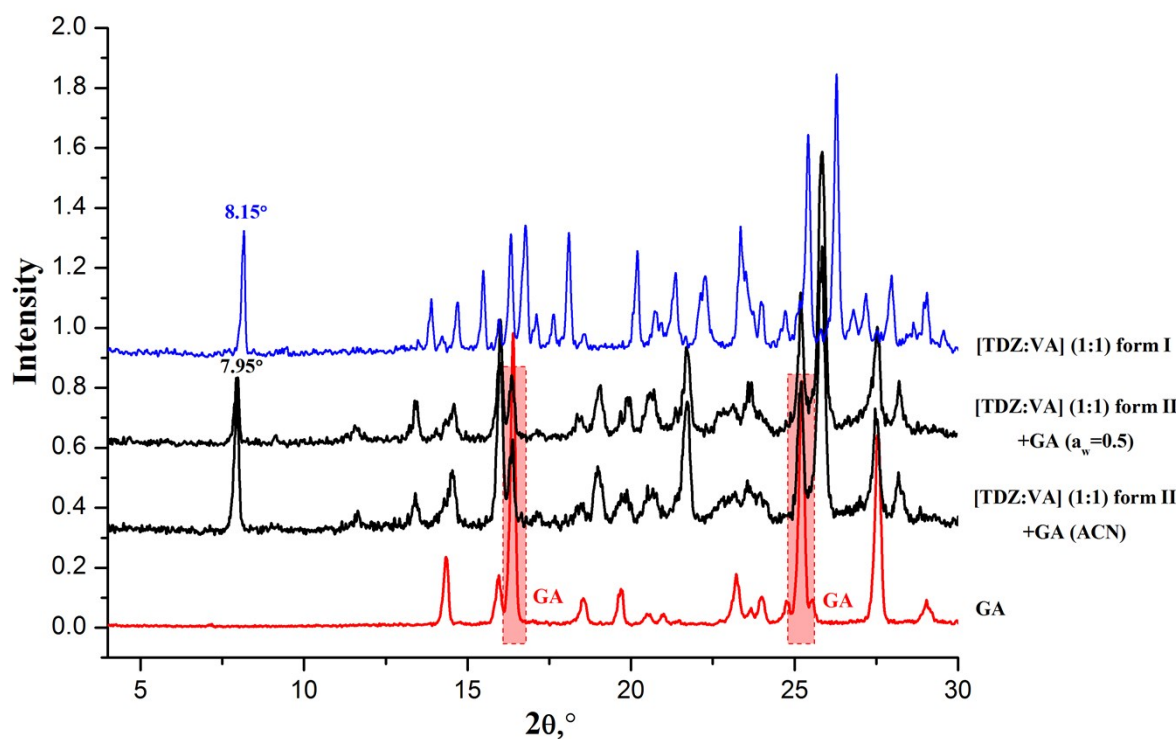

**Figure S10.** Experimental XRPD patterns of [TDZ:VA] (1:1) form II obtained as a result of competitive grinding reactions of TDZ, gallic acid and vanillic acid in the presence of ACN or ACN/H<sub>2</sub>O mixture with  $a_w = 0.5$ .

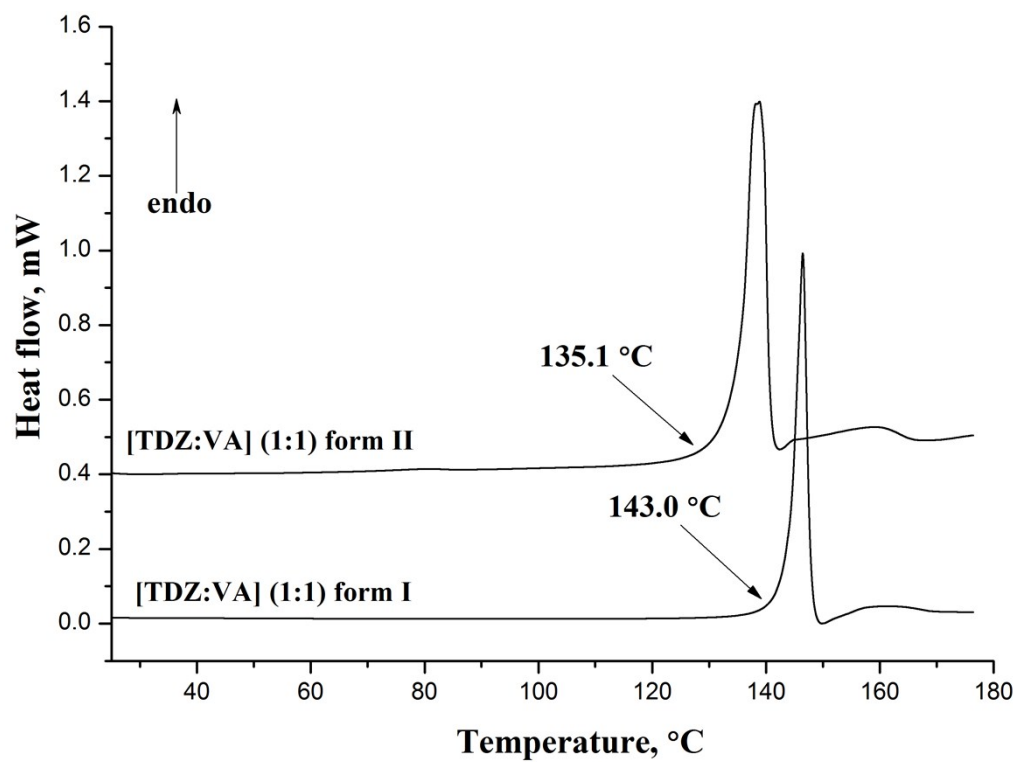

**Figure S11.** DSC curves of form I and form II of the [TDZ:VA] (1:1) cocrystal

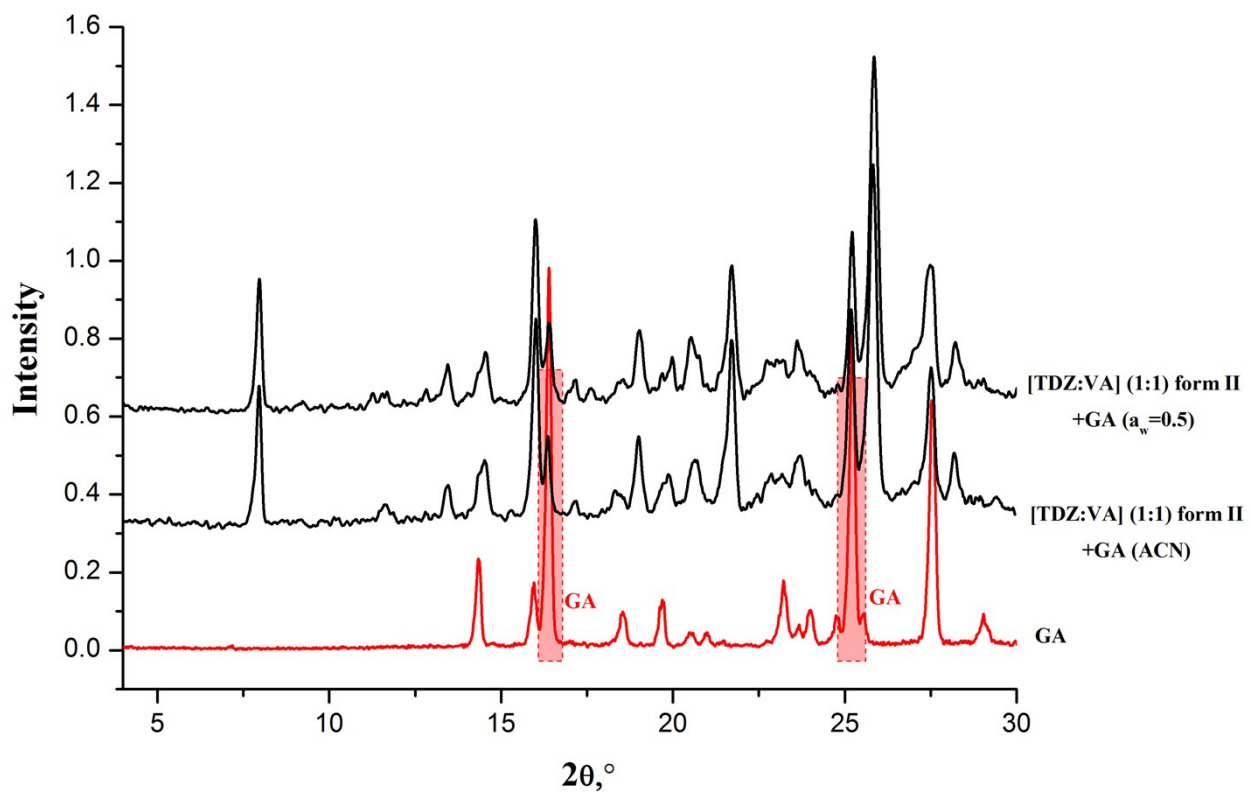

**Figure S12.** Experimental XRPD patterns of [TDZ:VA] (1:1) form II obtained as a result of exchange grinding reactions of [TDZ:GA] (2:1) with vanillic acid in the presence of ACN or ACN/H<sub>2</sub>O mixture with  $a_w = 0.5$ .

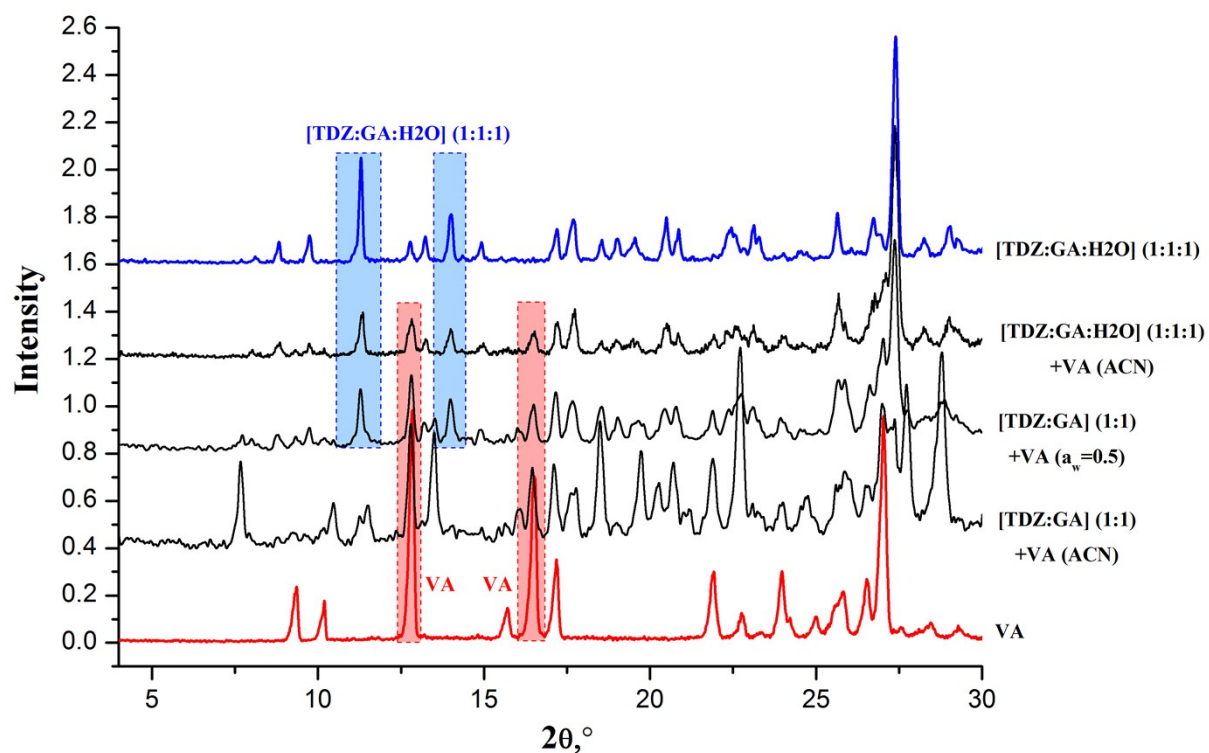

**Figure S13.** XRPD results of exchange grinding reactions of [TDZ:GA] (1:1) and [TDZ:GA:H2O] (1:1:1) with vanillic acid in the presence of ACN or ACN/H2O mixture with  $a_w = 0.5$ .

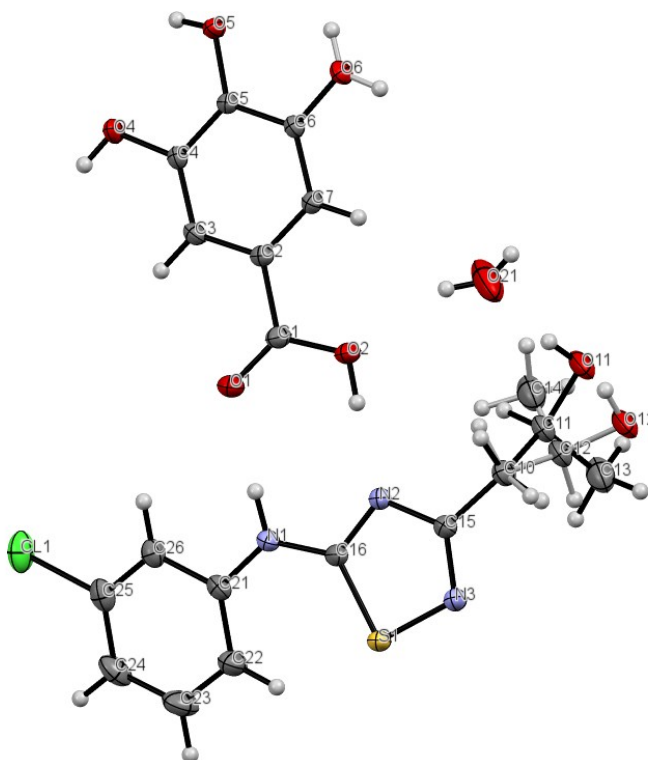

**Figure S14.** Molecular units in [TDZ:GA:H<sub>2</sub>O] (1:1:1). Displacement ellipsoids are shown at 50% probability. The higher site occupancy component in the **TDZ** molecule is shown with black bonds, and the lower one with grey bonds.



**Table S1.** The results of calculations of cocrystallization outcome from different predictive models for TDZ and GA or GA·H<sub>2</sub>O

|                                  | Hydrogen bond propensity calculations |            |                  |                                      | Molecular complementarity | $\Delta G_f^{298}(CC)$ calc.       |
|----------------------------------|---------------------------------------|------------|------------------|--------------------------------------|---------------------------|------------------------------------|
| Molecular structure of compounds | Interactions                          | Propensity | Interaction type | Conclusion                           | Result                    | Result                             |
|                                  | O16 – N11                             | 0.69       | TDZ-TDZ          | Low probability of cocrystallization | fail                      | 0.9 kJ/mol (Cocrystal is expected) |
|                                  | O16 – N12                             | 0.61       | TDZ-TDZ          |                                      |                           |                                    |
|                                  | O29 – N11                             | 0.56       | TDZ-GA           |                                      |                           |                                    |
|                                  | O16 – O28                             | 0.55       | TDZ-GA           |                                      |                           |                                    |
|                                  | O16 – O16                             | 0.52       | TDZ-TDZ          |                                      |                           |                                    |
|                                  | O29 – N12                             | 0.48       | TDZ-GA           |                                      |                           |                                    |
|                                  | O25 – N11                             | 0.48       | TDZ-GA           |                                      |                           |                                    |
|                                  | N7 – N11                              | 0.47       | TDZ-TDZ          |                                      |                           |                                    |
|                                  | O24 – N11                             | 0.47       | TDZ-GA           |                                      |                           |                                    |
|                                  | O26 – N11                             | 0.47       | TDZ-GA           |                                      |                           |                                    |
|                                  |                                       |            |                  |                                      |                           |                                    |
|                                  | O27 – N11                             | 0.66       | TDZ-H2O          | Result is inconclusive               | pass                      | n/a                                |
|                                  | O16 – N11                             | 0.64       | TDZ-TDZ          |                                      |                           |                                    |
|                                  | O27 – O27                             | 0.62       | H2O-H2O          |                                      |                           |                                    |
|                                  | O16 – O27                             | 0.60       | TDZ-H2O          |                                      |                           |                                    |
|                                  | O27 – N12                             | 0.58       | TDZ-H2O          |                                      |                           |                                    |
|                                  | O16 – N12                             | 0.56       | TDZ-TDZ          |                                      |                           |                                    |
|                                  | O27 – O29                             | 0.56       | GA-H2O           |                                      |                           |                                    |
|                                  | O27 – O16                             | 0.54       | TDZ-H2O          |                                      |                           |                                    |
|                                  | O29 – N11                             | 0.52       | TDZ-GA           |                                      |                           |                                    |
|                                  | O16 – O29                             | 0.52       | TDZ-GA           |                                      |                           |                                    |
|                                  | O16 – O16                             | 0.52       | TDZ-TDZ          |                                      |                           |                                    |
|                                  |                                       |            |                  |                                      |                           |                                    |
|                                  |                                       |            |                  |                                      |                           |                                    |

**Table S2.** Crystallographic data for the [TDZ:GA:H2O] (1:1:1) cocrystal

| Compound reference                                         | [TDZ:GA:H2O] (1:1:1)                                                                                               |
|------------------------------------------------------------|--------------------------------------------------------------------------------------------------------------------|
| Chemical formula                                           | C <sub>11</sub> H <sub>12</sub> ClN <sub>3</sub> OS•C <sub>7</sub> H <sub>6</sub> O <sub>5</sub> •H <sub>2</sub> O |
| Formula Mass                                               | 457.88                                                                                                             |
| Crystal system                                             | Triclinic                                                                                                          |
| a/ Å                                                       | 9.6276(8)                                                                                                          |
| b/ Å                                                       | 10.1883(8)                                                                                                         |
| c/ Å                                                       | 11.0539(9)                                                                                                         |
| $\alpha$ /°                                                | 90.533(1)                                                                                                          |
| $\beta$ /°                                                 | 100.803(1)                                                                                                         |
| $\gamma$ /°                                                | 105.940(1)                                                                                                         |
| Unit cell volume/ Å <sup>3</sup>                           | 1021.97(14)                                                                                                        |
| Temperature/K                                              | 150(2)                                                                                                             |
| Space group                                                | P-1                                                                                                                |
| No. of formula units per unit cell, Z                      | 2                                                                                                                  |
| Absorption coefficient, $\mu$ /mm <sup>-1</sup>            | 0.336                                                                                                              |
| No. of reflections measured                                | 12044                                                                                                              |
| No. of independent reflections                             | 5909                                                                                                               |
| R <sub>int</sub>                                           | 0.0123                                                                                                             |
| Final R <sub>1</sub> values (I > 2 $\sigma$ (I))           | 0.0447                                                                                                             |
| Final wR(F <sup>2</sup> ) values (I > 2 $\sigma$ (I))      | 0.1083                                                                                                             |
| Final R <sub>1</sub> values (all data)                     | 0.0474                                                                                                             |
| Final wR(F <sup>2</sup> ) values (all data)                | 0.1097                                                                                                             |
| Goodness of fit on F <sup>2</sup>                          | 1.182                                                                                                              |
| Largest diff. peak & hole, e <sup>-</sup> ·Å <sup>-3</sup> | 0.483 / -0.529                                                                                                     |

**Table S3.** Characteristics of the intermolecular (noncovalent) interactions in around water molecule in the crystals of [TDZ:GA:H<sub>2</sub>O] (1:1:1) build of TDZ conformation I and TDZ conformation II calculated by the solid-state DFT method coupled with the QTAIMC analysis of the periodic wave-function\*

| Interaction                | D(D···A)/ Å<br>(D(H···A)/ Å) | $\rho_b$ /<br>a.u. | $\nabla^2\rho_b$ /<br>a.u. | $G_b$ /<br>a.u. | $E_{int}$ /<br>kJ·mol <sup>-1</sup> |
|----------------------------|------------------------------|--------------------|----------------------------|-----------------|-------------------------------------|
| <b>TDZ conformation I</b>  |                              |                    |                            |                 |                                     |
| O11-H11···O21              | 2.800 (1.823)                | 0.033              | 0.098                      | 0.024           | <b>27.5</b>                         |
| O21-H20···O1               | 2.855 (1.883)                | 0.028              | 0.081                      | 0.020           | <b>22.7</b>                         |
| O6-H61···O21               | 2.872 (1.978)                | 0.025              | 0.070                      | 0.018           | <b>20.6</b>                         |
| O21-H21···O5               | 2.876 (2.115)                | 0.019              | 0.058                      | 0.015           | <b>16.7</b>                         |
| C10-H10B···O21             | 3.774 (2.709)                | 0.007              | 0.026                      | 0.005           | <b>5.8</b>                          |
| C10-H10A···O21             | 3.704 (2.739)                | 0.006              | 0.023                      | 0.005           | <b>5.3</b>                          |
| <b>TDZ conformation II</b> |                              |                    |                            |                 |                                     |
| O21-H20···O1               | 2.855 (1.892)                | 0.027              | 0.081                      | 0.020           | <b>22.9</b>                         |
| O6-H61···O21               | 2.872 (1.938)                | 0.027              | 0.072                      | 0.019           | <b>21.5</b>                         |
| O21-H21···O5               | 2.876 (2.252)                | 0.015              | 0.053                      | 0.013           | <b>14.3</b>                         |
| C10-H10D···O21             | 3.597 (2.607)                | 0.007              | 0.028                      | 0.006           | <b>6.3</b>                          |
| C14-H14B···O21             | 3.763 (2.785)                | 0.005              | 0.019                      | 0.004           | <b>4.3</b>                          |

\*The D···A and H···A distances,  $D(X···A)$  and  $D(H···A)$ , where D, A = O, and C; the electron density  $\rho_b$ , the Laplacian of the electron density  $\nabla^2\rho_b$  and local electronic kinetic energy density  $G_b$  at the bond critical point; the energy of the intermolecular noncovalent interaction  $E_{int}$ .

**Table S4.** Coformers, calculated values of Gibbs energy of cocrystal formation, predicted outcomes of cocrystallization along with experimental results.

| Coformer                     | TDZ:coformer<br>mol. ratio | $\Delta G_f^{298}(CC)$ calc,<br>[kJ·mol <sup>-1</sup> ] | Predicted<br>outcome      | Experimental<br>result |
|------------------------------|----------------------------|---------------------------------------------------------|---------------------------|------------------------|
| <b>2-Hydroxybenzamide</b>    | 1:1                        | 12.2                                                    | Cocrystal is not expected | no cocrystal           |
| <b>4-Aminobenzoic acid</b>   | 1:1                        | 6.8                                                     | Cocrystal is not expected | no cocrystal           |
| <b>4-Hydroxybenzoic acid</b> | 1:1                        | 8.5                                                     | Cocrystal is not expected | no cocrystal           |
| <b>4-Hydroxybenzamide</b>    | 1:1, 1:2                   | -0.8, 3.6                                               | Cocrystal is expected     | no cocrystal           |
| <b>Benzamide</b>             | 1:1                        | 22.7                                                    | Cocrystal is not expected | no cocrystal           |
| <b>Benzoic Acid</b>          | 1:1                        | 6.4                                                     | Cocrystal is not expected | no cocrystal           |
| <b>Caffeine (form I)</b>     | 1:1                        | 8.3                                                     | Cocrystal is not expected | no cocrystal           |
| <b>Malonic acid</b>          | 1:1                        | 46.7                                                    | Cocrystal is not expected | no cocrystal           |
| <b>Nicotinamide</b>          | 1:1                        | 21.9                                                    | Cocrystal is not expected | no cocrystal           |
| <b>Pimelic Acid</b>          | 1:1, 2:1                   | -21.1, -25.1                                            | Cocrystal is expected     | no cocrystal           |
| <b>Pyrazinamide</b>          | 1:1                        | 8.9                                                     | Cocrystal is not expected | no cocrystal           |
| <b>2-Hydroxybenzoic acid</b> | 1:1                        | 2.0                                                     | Cocrystal is expected     | no cocrystal           |
| <b>Succinic acid</b>         | 1:1                        | 5.6                                                     | Cocrystal is not expected | no cocrystal           |
| <b>1,2-phenylenediamine</b>  | 1:1                        | -0.3                                                    | Cocrystal is expected     |                        |
| <b>Flufenamic Acid</b>       | 1:1, 2:1                   | -1.7, -5.3                                              | Cocrystal is expected     |                        |
| <b>Fumaric Acid</b>          | 1:1                        | -1.5                                                    | Cocrystal is expected     |                        |
| <b>Phenazine</b>             | 1:1, 2:1                   | 4.1, 2.6                                                | Cocrystal is expected     |                        |

## References

1. G. Sheldrick, *Journal*, 1997.
2. G. Sheldrick, *Acta Crystallographica Section A*, 2008, **64**, 112-122.
3. R. Dovesi, R. Orlando, A. Erba, C. M. Zicovich-Wilson, B. Civalleri, S. Casassa, L. Maschio, M. Ferrabone, M. De La Pierre, P. D'Arco, Y. Noël, M. Causà, M. Rérat and B. Kirtman, *International Journal of Quantum Chemistry*, 2014, **114**, 1287-1317.
4. S. Grimme, *Journal of Computational Chemistry*, 2006, **27**, 1787-1799.
